# Supplementary material for: In Vivo Evaluation of Sgc8-c Aptamer as a Molecular Imaging Probe for Colon Cancer in a Mouse Xenograft Model
Source: MDPI journal article supplement (doi:10.3390/ijms23052466), 2022-02-23

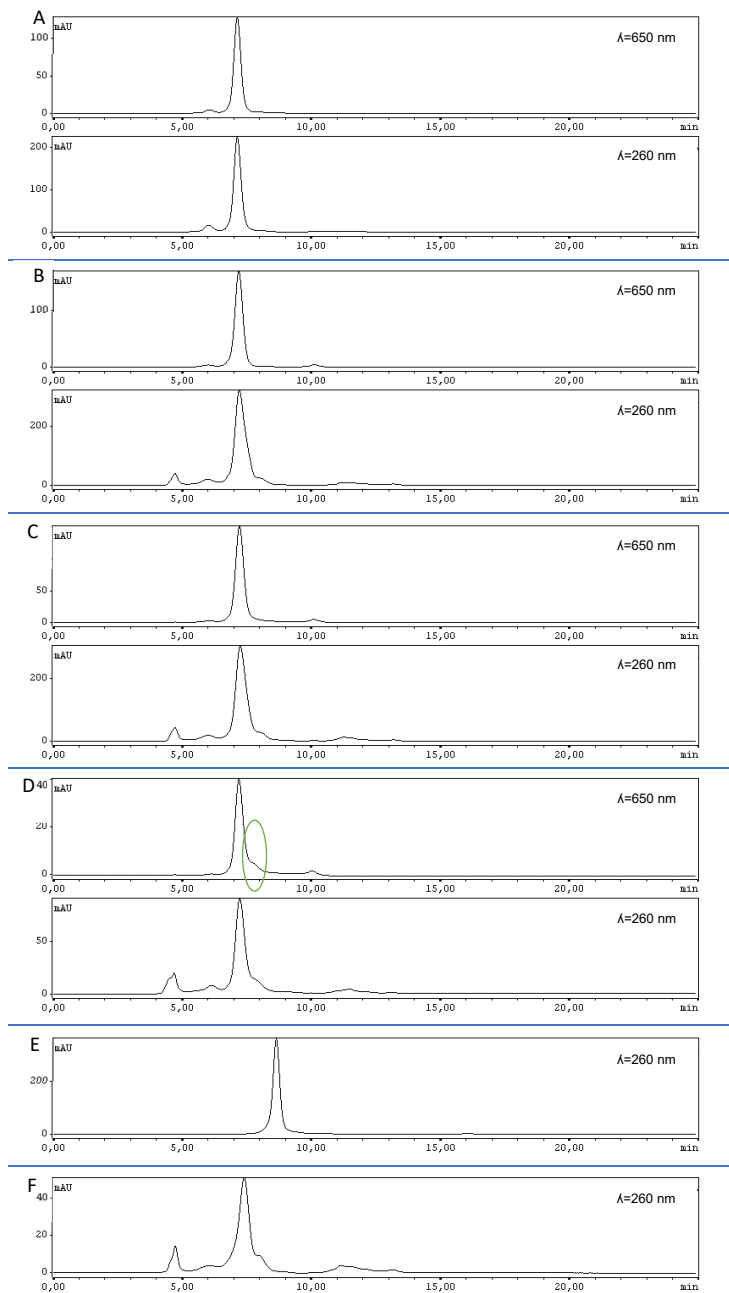

**Figure S1.** SE-HPLC stability evaluation of Sgc8-c-Alexa647 in serum. The figure shows 650nm and 260nm chromatograms of Sgc8-c-Alexa647 (A), and 40 min (B), 2 hours (C), and 24 hours (D) of incubation in mouse serum. A small shoulder at  $t_R=7.8$  min in the green circle was observed at 24 hours after incubation. A small oligonucleotide of MW = 5537 Da  $t_R=8.7$  min was used as control of fragmentation (E) and mouse serum (F) was also monitored.

**Table S1.** Biodistribution: Mean fluorescence intensity values per organ per animal.

| Organ    | 2 h post injection                         |         |         |         |          |         |          | 24 h post injection                        |         |         |         |         |         |          |
|----------|--------------------------------------------|---------|---------|---------|----------|---------|----------|--------------------------------------------|---------|---------|---------|---------|---------|----------|
|          | Mean fluorescence intensity (counts/pixel) |         |         |         |          |         |          | Mean fluorescence intensity (counts/pixel) |         |         |         |         |         |          |
|          | 1                                          | 2       | 3       | 4       | Control  | PROM    | $\sigma$ | 1                                          | 2       | 3       | 4       | Control | PROM    | $\sigma$ |
| Brain    | 504.521                                    | 470.531 | 506.851 | 606.472 | 429.5099 | 522.094 | 58.65    | 451.261                                    | 435.932 | 482.252 | 475.34  | 399.351 | 461.196 | 21.4508  |
| Blood    | 736.774                                    | 638.391 | 818.778 | 979.854 | 784.8681 | 793.449 | 144.5    | 297.38                                     | 488.455 | 285.057 | 433.67  | 476.937 | 376.141 | 100.703  |
| Heart    | 351.319                                    | 399.415 | 392.787 | 568.631 | 281.4486 | 428.038 | 96.115   | 324.716                                    | 310.015 | 286.267 | 299.11  | 289.799 | 305.027 | 16.3248  |
| Lungs    | 935.309                                    | 805.757 | 472.68  | 1530.84 | 417.2441 | 936.145 | 441.76   | 322.634                                    | 459.575 | 290.712 | 434.099 | 405.463 | 376.755 | 82.6234  |
| Spleen   | 334.115                                    | 360.502 | 363.922 | 455.33  | 299.009  | 378.467 | 52.944   | 313.33                                     | 397.467 | 389.866 | 346.217 | 283.405 | 361.72  | 39.3787  |
| Pancreas | 689.324                                    | 781.135 | 674.382 | 1164.43 | 463.1552 | 827.319 | 229.65   | 495.765                                    | 484.629 | 533.39  | 467.351 | 466.558 | 495.284 | 27.965   |
| Kidneys  | 6310.59                                    | 5850.25 | 3793.83 | 6584.13 | 1215.062 | 5634.7  | 1264.1   | 1837.85                                    | 1451.61 | 1388.42 | 1396.99 | 1258.6  | 1518.72 | 214.589  |
| Liver    | 972.153                                    | 1089.26 | 785.663 | 1274.87 | 716.8325 | 1030.49 | 205.36   | 764.951                                    | 612.234 | 658.633 | 650.371 | 605.542 | 671.547 | 65.4663  |
| Muscle   | 342.08                                     | 468.301 | 412.281 | 548.926 | 245.8536 | 442.897 | 87.538   | 269.284                                    | 275.663 | 261.377 | 348.68  | 250.719 | 288.751 | 40.3777  |
| Bone     | 646.173                                    | 644.386 | 489.325 | 3026.47 | 284.1597 | 1201.59 | 1218.8   | 474.588                                    | 440.449 | 385.359 | 377.285 | 332.911 | 419.42  | 46.2646  |
| Tumor    | 4335.58                                    | 3395.16 | 3601    | 1759.1  | 426.9561 | 3272.71 | 1086.8   | 793.421                                    | 730.171 | 813.452 | 1063.29 | 344.856 | 850.083 | 146.502  |
| Organ    | 48 h post injection                        |         |         |         |          |         |          | Competition Test                           |         |         |         |         |         |          |
|          | Mean fluorescence intensity (counts/pixel) |         |         |         |          |         |          | Mean fluorescence intensity (counts/pixel) |         |         |         |         |         |          |
|          | 1                                          | 2       | 3       | 4       | Control  | PROM    | $\sigma$ | 1                                          | 2       | 3       | 4       | Control | PROM    | $\sigma$ |
| Brain    | 392.316                                    | 391.762 | 433.95  | 408.431 | 368.1245 | 406.615 | 19.795   | 404.891                                    | 507.101 | 415.232 | 649.994 | 512.473 | 494.304 | 113.505  |
| Blood    | 252.736                                    | 263.151 | 251.745 | 340.785 | 219.8493 | 277.104 | 42.766   | 364.838                                    | 1039.95 | 584.45  | 682.707 | 710.736 | 667.986 | 281.337  |
| Heart    | 267.718                                    | 261.813 | 232.072 | 292.634 | 267.7928 | 263.559 | 24.88    | 372.311                                    | 482.541 | 353.884 | 542.042 | 277.341 | 437.695 | 89.8125  |
| Lungs    | 368.621                                    | 416.318 | 432.332 | 336.715 | 351.7433 | 388.497 | 43.863   | 715.685                                    | 879.916 | 476.447 | 1531.12 | 552.635 | 900.793 | 451.696  |
| Spleen   | 291.557                                    | 321.784 | 280.526 | 315.85  | 292.5432 | 302.429 | 19.602   | 318.399                                    | 367.275 | 342.857 | 486.677 | 290.798 | 378.802 | 74.6334  |
| Pancreas | 459.149                                    | 471.19  | 429.256 | 474.445 | 377.1959 | 458.51  | 20.582   | 708.472                                    | 823.182 | 590.978 | 923.908 | 545.138 | 761.635 | 143.841  |
| Kidneys  | 1092.26                                    | 948.358 | 1361.31 | 1283.12 | 831.0224 | 1171.26 | 186.69   | 3204.37                                    | 5965.06 | 2648.5  | 5577.53 | 1428.37 | 4348.87 | 1665.61  |
| Liver    | 730.343                                    | 590.764 | 624.249 | 501.598 | 449.223  | 611.739 | 94.506   | 1054.69                                    | 1018.99 | 767.686 | 1243.19 | 657.649 | 1021.14 | 195.512  |
| Muscle   | 249.305                                    | 231.046 | 287.272 | 276.445 | 222.4296 | 261.017 | 25.578   | 297.038                                    | 639.325 | 381.806 | 563.942 | 243.184 | 470.528 | 158.313  |
| Bone     | 475.751                                    | 314.62  | 328.248 | 349.613 | 300.1834 | 367.058 | 73.879   | 365.072                                    | 480.728 | 393.903 | 444.304 | 278.136 | 421.002 | 51.5516  |
| Tumor    | 930.212                                    | 681.302 | 549.283 | 596.612 | 347.6253 | 689.352 | 169.61   | 1068.65                                    | 1717.5  | 1128.95 | 1384.68 | 496.898 | 1324.94 | 295.394  |

**Figure S2.** Pharmacokinetic: Visual predictive check Sgc8-c blood fluorescence (ROI/ $\mu$ L) vs time (min).

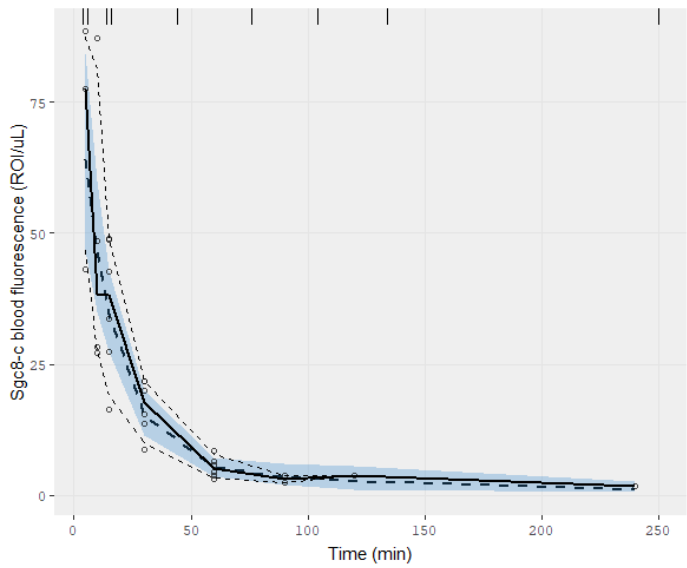

**Figure S3.** Individual fits for the final model in logarithmic scale. Blue dots correspond to the observations of aptamer in blood. (ROI/ $\mu$ L). The line reflects the model-based pharmacokinetic curve.

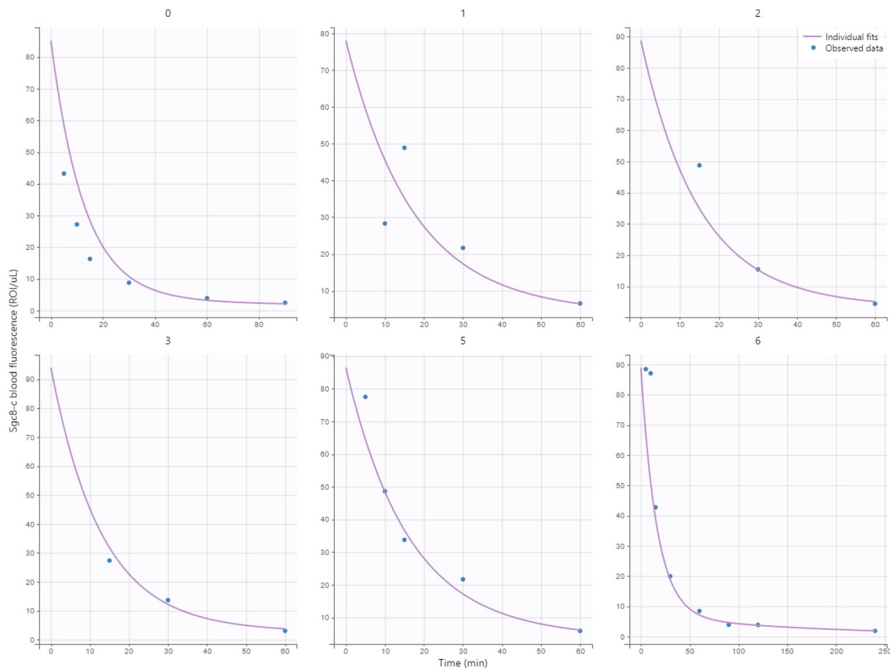

**Figure S4.** Visual predictive check (VPC) for the final model. Observations are shown as dots. The blue line stands for the median of the observations. Black line represents the model-based predicted median. Overall, the VPC shows a good fit of the data obtained after administration of both formulations.

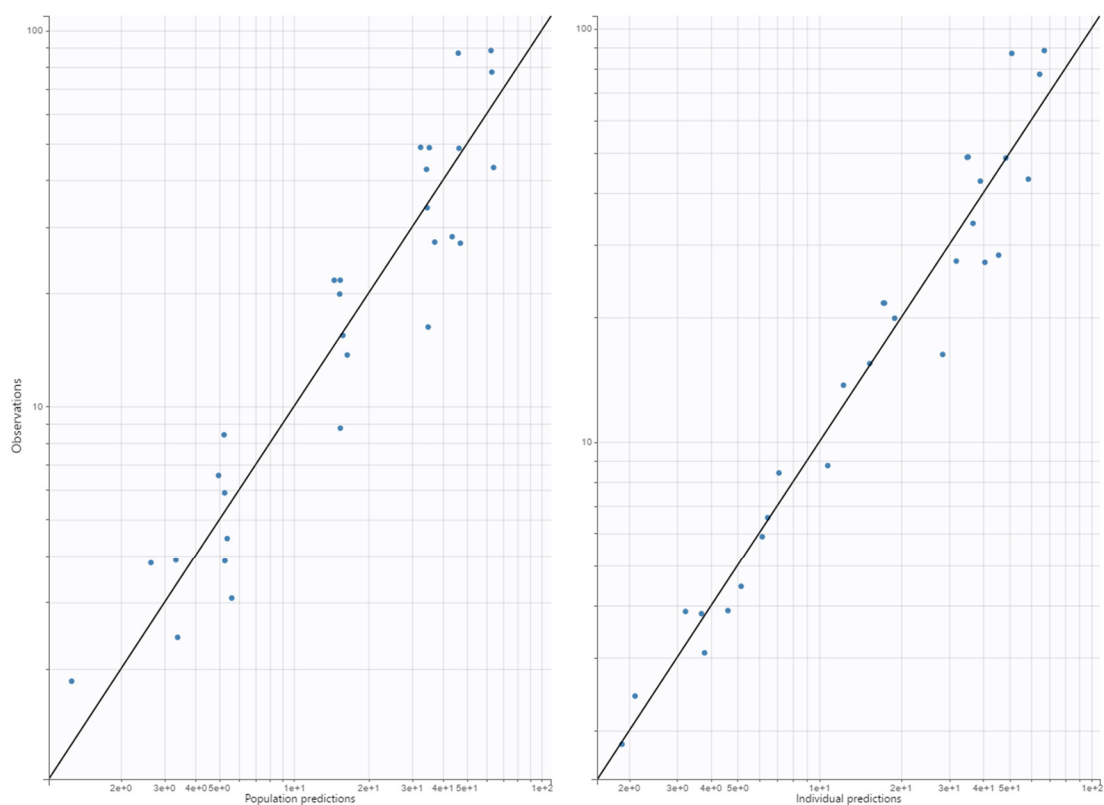

Supplement: s1 [file s1]
